# Supplementary material for: Correlation of selected molecular properties and recovery values in volatile organic compounds analysis: comparison of two water matrices
Source: Royal Society of Chemistry journal article supplement (doi:10.1039/c4ra06123c), 2014-01-01
Supplement: c4ra06123c1.pdf [file c4ra06123c1.pdf]

**Supplementary material S1. In house method performance and literature findings**

| Compound            | Sample type     | Compound concentration (µg/L) | Mean values ± sd <sup>a</sup> (µg/L) | No. of samples | RSD <sup>b</sup> % | MDL <sup>c</sup> (µg/L) | PQL (µg/L) | SM <sup>e</sup> , 1998 MDL (µg/L) | EPA 8260B MDL (µg/L) |
|---------------------|-----------------|-------------------------------|--------------------------------------|----------------|--------------------|-------------------------|------------|-----------------------------------|----------------------|
| Vinyl chloride      | CW <sup>f</sup> | 0.2                           | 0.250±0.02                           | 6              | 8.0                | 0.10                    | 0.50       | 0.120                             | 0.17                 |
|                     | GW <sup>g</sup> | 0.2                           | 0.190±0.02                           | 6              | 10.5               | 0.10                    | 0.50       |                                   |                      |
| Chloroform          | CW              | 0.4                           | 0.637±0.07                           | 6              | 10.2               | 0.32                    | 1.60       | 0.126                             | 0.03                 |
|                     | GW              | 0.4                           | 0.365±0.02                           | 6              | 5.9                | 0.11                    | 0.55       |                                   |                      |
| 1,1,1-TCE           | CW              | 0.4                           | 0.485±0.01                           | 6              | 2.2                | 0.052                   | 0.26       | 0.043                             | 0.08                 |
|                     | GW              | 0.4                           | 0.465±0.01                           | 6              | 2.3                | 0.052                   | 0.26       |                                   |                      |
| 1,2-DCE             | CW              | 0.4                           | 0.348±0.01                           | 6              | 2.8                | 0.049                   | 0.25       | 0.055                             | 0.04                 |
|                     | GW              | 0.4                           | 0.347±0.01                           | 6              | 2.4                | 0.040                   | 0.20       |                                   |                      |
| Benzene             | CW              | 0.4                           | 0.215±0.005                          | 6              | 2.6                | 0.027                   | 0.14       | 0.036                             | 0.04                 |
|                     | GW              | 0.4                           | 0.252±0.015                          | 6              | 5.9                | 0.073                   | 0.37       |                                   |                      |
| Trichloroethene     | CW              | 0.4                           | 0.400±0.025                          | 6              | 6.1                | 0.121                   | 0.60       | 0.045                             | 0.19                 |
|                     | GW              | 0.4                           | 0.302±0.012                          | 6              | 3.9                | 0.058                   | 0.29       |                                   |                      |
| BDCM                | CW              | 0.4                           | 0.518±0.019                          | 6              | 3.7                | 0.096                   | 0.48       | 0.112                             | 0.08                 |
|                     | GW              | 0.4                           | 0.487±0.008                          | 6              | 1.7                | 0.040                   | 0.20       |                                   |                      |
| Toluene             | CW              | 0.4                           | 0.707±0.043                          | 6              | 6.1                | 0.211                   | 1.06       | 0.047                             | 0.11                 |
|                     | GW              | 0.4                           | 0.605±0.021                          | 6              | 3.4                | 0.102                   | 0.51       |                                   |                      |
| DBCM                | CW              | 0.4                           | 0.478±0.019                          | 6              | 4.1                | 0.096                   | 0.48       | 0.133                             | 0.05                 |
|                     | GW              | 0.4                           | 0.482±0.008                          | 6              | 1.6                | 0.037                   | 0.19       |                                   |                      |
| Tetrachloroethene   | CW              | 0.4                           | 0.365±0.021                          | 6              | 5.7                | 0.102                   | 0.51       | 0.047                             | 0.05                 |
|                     | GW              | 0.4                           | 0.475±0.008                          | 6              | 1.8                | 0.041                   | 0.20       |                                   |                      |
| Chlorobenzene       | CW              | 0.4                           | 0.467±0.025                          | 6              | 5.4                | 0.124                   | 0.62       | 0.052                             | 0.04                 |
|                     | GW              | 0.4                           | 0.433±0.005                          | 6              | 1.2                | 0.026                   | 0.13       |                                   |                      |
| Ethylbenzene        | CW              | 0.4                           | 0.360±0.026                          | 6              | 7.4                | 0.130                   | 0.65       | 0.032                             | 0.06                 |
|                     | GW              | 0.4                           | 0.323±0.008                          | 6              | 2.5                | 0.040                   | 0.20       |                                   |                      |
| m+p xylene          | CW              | 0.4                           | 0.240±0.032                          | 6              | 13.2               | 0.156                   | 0.78       | 0.038                             | 0.05/0.13            |
|                     | GW              | 0.4                           | 0.187±0.001                          | 6              | 4.4                | 0.040                   | 0.20       |                                   |                      |
| o-xylene            | CW              | 0.4                           | 0.308±0.042                          | 6              | 13.5               | 0.206                   | 1.03       | 0.038                             | 0.11                 |
|                     | GW              | 0.4                           | 0.202±0.012                          | 6              | 5.8                | 0.058                   | 0.29       |                                   |                      |
| Bromoform           | CW              | 0.4                           | 0.292±0.029                          | 6              | 10.0               | 0.144                   | 0.72       | 0.131                             | 0.12                 |
|                     | GW              | 0.4                           | 0.243±0.016                          | 6              | 6.7                | 0.081                   | 0.40       |                                   |                      |
| 1,2-dichlorobenzene | CW              | 0.4                           | 0.545±0.046                          | 6              | 8.5                | 0.229                   | 1.15       | 0.031                             | 0.03                 |
|                     | GW              | 0.4                           | 0.562±0.016                          | 6              | 6.8                | 0.079                   | 0.40       |                                   |                      |
| 1,4-dichlorobenzene | CW              | 0.4                           | 0.505±0.053                          | 6              | 10.5               | 0.263                   | 1.32       | 0.031                             | 0.03                 |
|                     | GW              | 0.4                           | 0.543±0.037                          | 6              | 6.8                | 0.181                   | 0.90       |                                   |                      |

<sup>a</sup>sd – standard deviation

<sup>b</sup>RSD – relative standard deviation of recovery

<sup>c</sup>MDL - method detection limit

<sup>d</sup>PQL – practical quantitation level

<sup>e</sup>SM – Standard Methods for the examination of Water and Wastewater (AWWA- APHA-WEF, 1998)

<sup>f</sup>CW – clean water matrix

<sup>g</sup>GW – natural matrix
