# Supplementary material for: Correlation of selected molecular properties and recovery values in volatile organic compounds analysis: comparison of two water matrices
Source: Royal Society of Chemistry journal article supplement (doi:10.1039/c4ra06123c), 2014-01-01
Supplement: c4ra06123c2.xlsx [file c4ra06123c2.xlsx]

## Sheet: Medijane
Supplementary table S2. Descriptor values for 18 VOC.
		1	2	3	4	5	6	7	8	9
	VOC	S (mg/L)	HLC (atm-m3/mol)	log Kow	Di,a (cm2/s)	Di,w (cm2/s)	MW	Pol	Hy	MR
1	Vinyl chloride	2760	0.027	1.5	0.106	1.23e-06	62.5	0	-0.528	14.777
2	Chloroform	7920	0.00367	1.92	0.104	1e-05	119.37	0	-0.215	21.367
3	1.1.1-Trichloroethane	1330	0.0172	2.48	0.078	8.8e-06	133.4	0	-0.359	26.217
4	1,2-Dichloroethane	8520	0.000979	1.47	0.104	9.9e-06	98.96	1	-0.431	20.656
5	Benzene	1750	0.00555	2.13	0.088	9.8e-06	78.12	3	-0.921	26.058
6	Toluene	1100	0.0103	2.71	0.079	9.1e-06	131.38	2	-0.359	25.262
7	Bromodichloromethane	6740	0.0016	2.1	0.0298	1.06e-05	163.82	0	-0.215	24.176
8	Tetrachloroethylene	526	0.00664	2.75	0.087	8.6e-06	92.15	5	-0.936	31.099
9	Chlorodibromomethane	2600	0.000783	2.17	0.0196	1.05e-05	208.27	0	-0.215	26.984
10	Trichloerethylene	200	0.0184	2.67	0.072	8.2e-06	165.82	4	-0.307	30.945
11	Chlorobenzene	472	0.0037	2.86	0.073	8.7e-06	112.56	5	-0.802	30.863
12	Ethylbenzene	169	0.00788	3.14	0.075	7.8e-06	106.18	7	-0.946	35.7
13	m-Xylene	161	0.00734	3.2	0.07	7.8e-06	106.18	7	-0.946	36.14
14	p-Xylene	185	0.00766	3.17	0.0769	8.44e-06	106.18	7	-0.946	36.14
15	o-Xylene	178	0.00519	3.13	0.087	1e-05	106.18	8	-0.946	36.14
16	Bromoform	3100	0.000535	2.35	0.0149	1.03e-05	252.72	0	-0.215	29.793
17	1,2-Dichlorobenzene	156	0.0019	3.43	0.069	7.9e-06	147	8	-0.71	35.668
18	1,4-Dichlorobenzene	73.8	0.00243	3.42	0.069	7.9e-06	147	7	-0.71	35.668
